# Supplementary material for: Diagnosis trajectories of prior multi-morbidity predict sepsis mortality
Source: PubMed Central journal article supplement (PMC5095673; doi:10.1038/srep36624), 2016-11-04
Supplement: srep36624-s1.pdf [file srep36624-s1.pdf]

**Diagnosis trajectories of prior multi-morbidity predict sepsis  
mortality**

Mette K. Beck, Anders Boeck Jensen, Annelaura Bach Nielsen, Anders Perner, Pope

L. Moseley, Søren Brunak

## Supplementary text

### Results

#### *231 diagnoses altered the sepsis mortality*

As expected we observed differences both among and within ICD-10 chapters. Diagnoses associated increasing  $RR_{\text{sepsis dead}}$  the most were in particular observed within the chapters: ‘Certain conditions originating in the perinatal period’, ‘Congenital malformations, deformations and chromosomal abnormalities’, ‘Endocrine, nutritional and metabolic diseases’ and ‘Neoplasms’. In the other end of the spectrum, most diagnoses within ‘Diseases of the musculoskeletal system and connective’ and ‘Diseases of the genitourinary system’ were associated with decreased  $RR_{\text{sepsis dead}}$ . Among all chapters, the unspecific ‘Factors influencing health status and contact with health services’ displayed a large variation in  $RR_{\text{sepsis dead}}$ . The top seven diseases shown in eFigure 2 are within ‘Diseases in the perinatal periods’. They have an  $RR_{\text{sepsis dead}}$  spanning from 9.7 to 27.7 and are followed by four diseases from ‘Congenital malformations, deformations and chromosomal abnormalities’. These likely represent miscoding, and should have been assigned P36 ‘Bacterial sepsis of newborn’ rather than A41. Subsequently, the hormonal and metabolism related diagnoses ‘Disorders of glycoprotein metabolism’ and ‘Other ill-defined and unspecified causes of mortality’ top the list with an  $RR_{\text{sepsis dead}}$  of 5.2 and 5.9 (p-values =  $4.69 \cdot 10^{-2}$  and  $1.65 \cdot 10^{-31}$ ), respectively. Interestingly, all malignant cancer diagnoses score an  $RR_{\text{sepsis dead}}$  between 1.5 and 2.8, including several secondary malignant neoplasms. ‘Anemias in diseases classified elsewhere’ and ‘Other Anemias’ had an  $RR_{\text{sepsis dead}}$  of 1.6 and 1.5 (p-values =  $2.96 \cdot 10^{-35}$  and  $2.51 \cdot 10^{-110}$ ), respectively. Insulin-dependent diabetes mellitus (IDDM) had an  $RR_{\text{sepsis dead}}$  of 1.13

(p-value =  $2.72 \cdot 10^{-4}$ ), whereas the value for non-insulin-dependent diabetes mellitus (NIDDM) was 1.11 (p-value =  $5.33 \cdot 10^{-6}$ ).

*Sepsis patients stratified into more than 2,200 different trajectories*

We observed a long tailed distribution, where a few trajectories were followed by many patients, while most trajectories were followed by fewer patients. We found that 21 of the top 45 trajectories belonged mainly to ‘Diseases of the circulatory system’, confirming that many sepsis patients had chronic cardio-vascular problems (eTable 2). 3,366 patients followed the most common trajectory, where patients had ‘Angina Pectoris’ before ‘Chronic ischemic heart disease’ with ‘Pneumonia’ third. Another 15 of the top 45 trajectories belonged to the ‘Endocrine, nutritional and metabolic diseases’ chapter. More specifically, these 15 trajectories all contained two or three of the diabetes ICD-10 codes (‘IDDM’, ‘NIDDM’, and ‘unspecific diabetes mellitus’), confirming, that many patients with sepsis had diabetes mellitus prior to their sepsis diagnosis.

Many patients followed several pathways, especially trajectories containing similar diagnoses within the same chapter. We therefore decided to examine the number of patients that followed each trajectory in a manner where each patient only was counted in the most populated trajectory he/she followed thereby visualizing better the diversity across the sepsis population.

We then observed several new chapters occurring, including ‘Diseases of the genitourinary system’, ‘Diseases of the respiratory system’, ‘Neoplasms’, ‘Diseases of the blood and blood-forming organs and certain disorders involving the immune

mechanism' and 'Diseases of the musculoskeletal system and connective tissue'. This again indicated that patients getting sepsis were relatively diverse segregating into several major, but largely independent patient sub-groups.

## **Discussion**

### *Mortality measure*

30-day mortality is the most widely used measure, although some studies use in-hospital or 90-day mortality. The in-hospital and 30-day mortality for sepsis patients are similar (24), whereas the 90-day mortality may include late adverse effects of sepsis and related therapies (25). For simplicity, we chose 30-day mortality for this analysis.

### *Unspecific diagnosis*

In our data, unspecific diagnoses like "Other anemias", "Other septicaemia" and "Bacterial pneumonia, not elsewhere classified" were much more frequently used than specific diagnoses like "Anemia in chronic diseases classified elsewhere", "Streptococcal sepsis" or "Pneumonia due to Streptococcus pneumonia". This might be explained by the fact that specific diagnoses often require more and longer patient examination, but it may also be that doctors have to assign diagnoses outside of their main area of expertise.

Analyzing registry data containing 120,000 sepsis patients can lead to extremely low p-values, which proves a significant difference in the mean of the groups. However, it is important to emphasize the importance of the change in sepsis mortality rather than only focusing on the significance level. Sepsis patients with 'anemias in diseases classified elsewhere' or 'other Anemias' had an  $RR_{\text{sepsis dead}}$  of 1.6 and 1.5 (p-values =

$2.96 \cdot 10^{-35}$  and  $2.51 \cdot 10^{-110}$ ), respectively. The difference in p-value is uninteresting, whereas the similar change in mortality indicates an equal medical relevance.

We confirmed the pattern of comorbidities found in the Danish data by comparing it to a Swedish comorbidity study, using similar Swedish electronic patient records<sup>8</sup>.

The Swedish cohort was significantly smaller (3,409 sepsis patients and 600,000 patients overall), but confirmed the comorbidities found in our main trajectory network (eFigure 4).

## Figures

**Figure 1. Survival curve for sepsis patients.** The survival curve shows the survival ratio for patients diagnosed with A41.

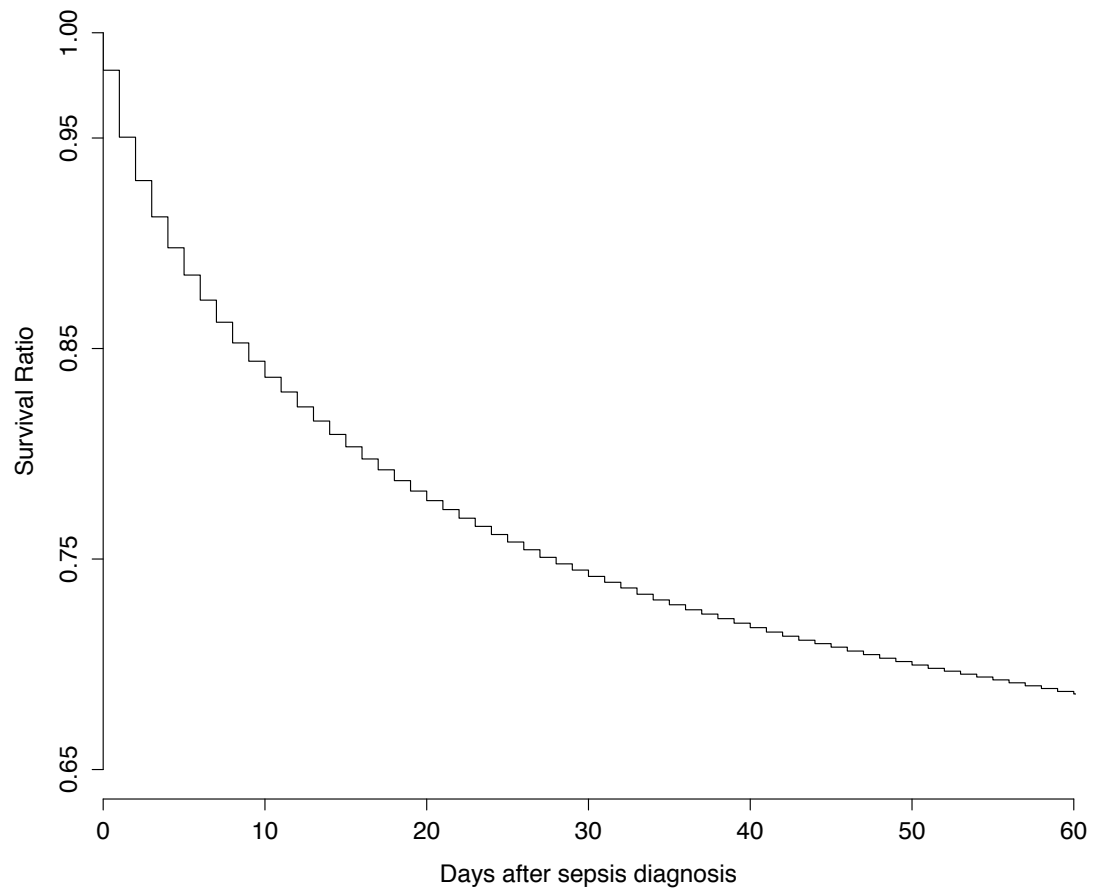

**Figure 2. Prior individual diagnoses significantly changed the risk ratio of dying from sepsis within 30 days.** Each dot represents an ICD-10 level 3 diagnosis acquired before the sepsis diagnosis (A41).

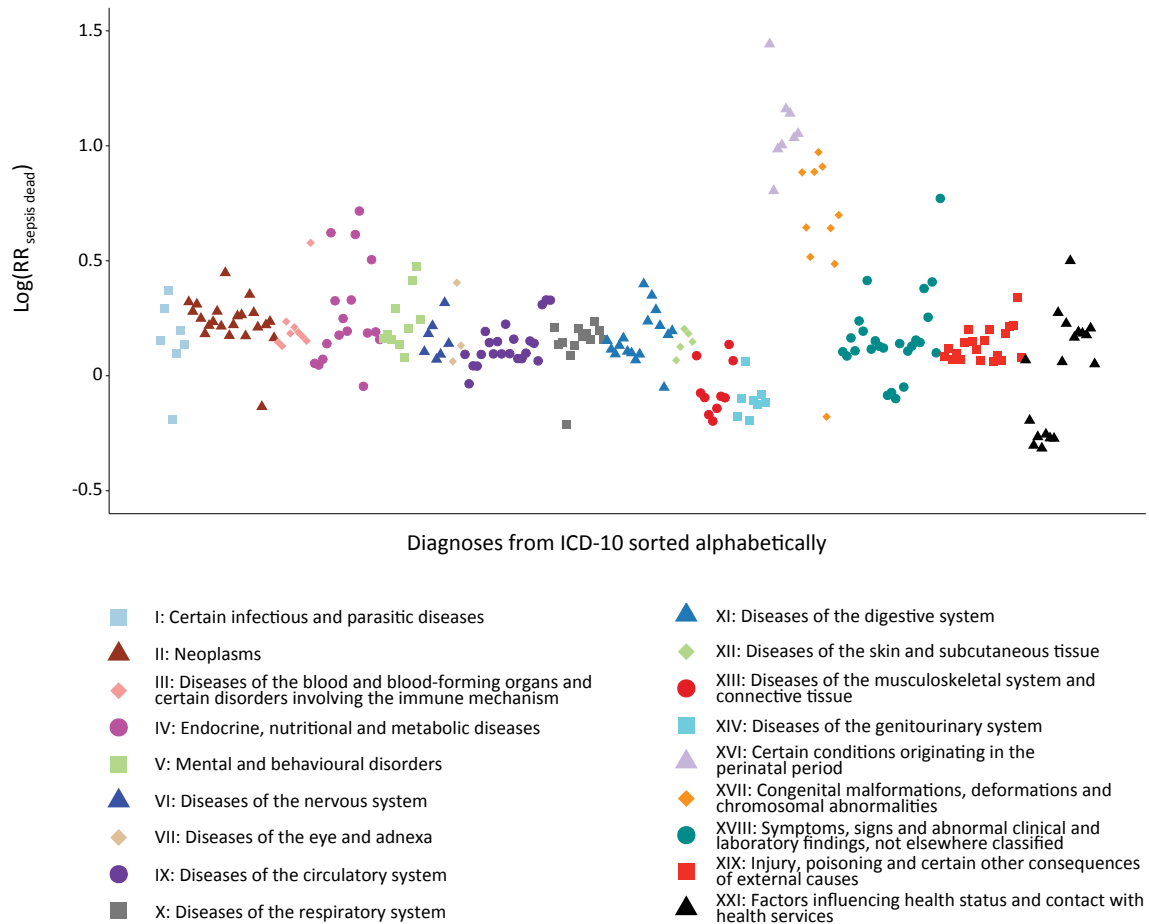

**eFigure 3. Age and gender distribution for the most common anaemia diagnosis (D64).** The plot shows the age distribution for the onset of anemia in male (blue) and female (red) patients. Both groups peak in the early eighties.

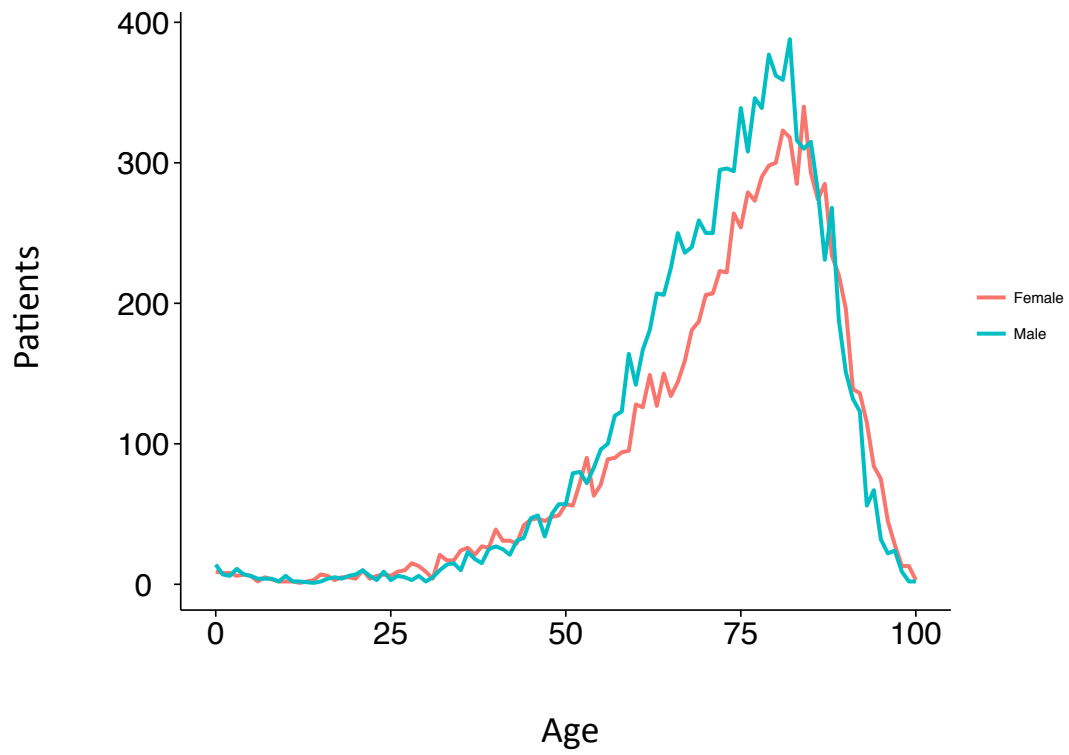



**eTable 1. List of neoplasms, stated or presumed to be primary, of lymphoid, haematopoietic and related tissues.** The table indicates significant  $RR_{\text{sepsis dead}}$  values for patients having had one of these cancer diagnoses previously and the corresponding Benjamini-Hochberg corrected p-value.

| <b>ICD -<br/>10</b> | <b>Disease</b>                                                                           | <b><math>RR_{\text{sepsis}}</math><br/>dead</b> | <b>BH corrected<br/>P-value</b> | <b>Patient<br/>count</b> |
|---------------------|------------------------------------------------------------------------------------------|-------------------------------------------------|---------------------------------|--------------------------|
| <b>C81</b>          | Hodgkin lymphoma                                                                         | 0.87                                            | 0.73                            | 814                      |
| <b>C82</b>          | Follicular lymphoma                                                                      | 0.85                                            | 0.31                            | 887                      |
| <b>C83</b>          | Non-follicular lymphoma                                                                  | 0.73                                            | $2.31 \cdot 10^{-9}$            | 2,551                    |
| <b>C84</b>          | Mature T/NK-cell lymphomas                                                               | 1.10                                            | 0.93                            | 476                      |
| <b>C85</b>          | Other and unspecified types of non-Hodgkin lymphoma                                      | 0.86                                            | 0.01                            | 2,659                    |
| <b>C86</b>          | Other specified types of T/NK-cell lymphoma                                              | 1.04                                            | 0.93                            | 24                       |
| <b>C88</b>          | Malignant immunoproliferative diseases                                                   | 1.02                                            | 0.93                            | 392                      |
| <b>C90</b>          | Multiple myeloma and malignant plasma cell neoplasms                                     | 1.03                                            | 0.93                            | 1810                     |
| <b>C91</b>          | Lymphoid leukaemia                                                                       | 1.11                                            | 0.31                            | 2,662                    |
| <b>C92</b>          | Myeloid leukaemia                                                                        | 1.43                                            | $1.81 \cdot 10^{-12}$           | 2,213                    |
| <b>C93</b>          | Monocytic leukaemia                                                                      | 1.57                                            | 0.01                            | 815                      |
| <b>C94</b>          | Other leukaemias of specified cell type                                                  | 1.40                                            | 0.10                            | 271                      |
| <b>C95</b>          | Leukaemia of unspecified cell type                                                       | 1.42                                            | $3.43 \cdot 10^{-5}$            | 904                      |
| <b>C96</b>          | Other and unspecified malignant neoplasms of lymphoid, haematopoietic and related tissue | 1.19                                            | 0.93                            | 148                      |

**eTable 2. List of diseases in the 45 most populated trajectories.**

| Top 45 trajectories |                                                            |       | Top 45 trajectories with unique patients |                                         |       |
|---------------------|------------------------------------------------------------|-------|------------------------------------------|-----------------------------------------|-------|
| ICD                 | Disease                                                    | Count | ICD                                      | Disease                                 | Count |
| I20                 | Angina pectoris                                            | 3366  | I20                                      | Angina pectoris                         | 3366  |
| I25                 | Chronic ischaemic heart disease                            |       | I25                                      | Chronic ischaemic heart disease         |       |
| J18                 | Pneumonia, organism unspecified                            |       | J18                                      | Pneumonia, organism unspecified         |       |
| E11                 | Non-Insulin-dependent diabetes mellitus                    | 2514  | E11                                      | Non-Insulin-dependent diabetes mellitus | 2822  |
| E10                 | Insulin-dependent diabetes mellitus                        |       | E10                                      | Insulin-dependent diabetes mellitus     |       |
| E14                 | Unspecified diabetes mellitus                              |       | E14                                      | Unspecified diabetes mellitus           |       |
| H91                 | Other hearing loss                                         | 1280  | I21                                      | Acute myocardial infarction             | 2476  |
| I20                 | Angina pectoris                                            |       | I25                                      | Chronic ischaemic heart disease         |       |
| I25                 | Chronic ischaemic heart disease                            |       | J18                                      | Pneumonia, organism unspecified         |       |
| N40                 | Hyperplasia of prostate                                    | 1225  | E11                                      | Non-Insulin-dependent diabetes mellitus | 2364  |
| I10                 | Essential (primary) hypertension                           |       | E10                                      | Insulin-dependent diabetes mellitus     |       |
| N30                 | Cystitis                                                   |       | J18                                      | Pneumonia, organism unspecified         |       |
| E11                 | Non-Insulin-dependent diabetes mellitus                    | 1020  | I20                                      | Angina pectoris                         | 2294  |
| E10                 | Insulin-dependent diabetes mellitus                        |       | I25                                      | Chronic ischaemic heart disease         |       |
| H25                 | Senile cataract                                            |       | N30                                      | Cystitis                                |       |
| I21                 | Acute myocardial infarction                                | 741   | H91                                      | Other hearing loss                      | 2171  |
| I25                 | Chronic ischaemic heart disease                            |       | I20                                      | Angina pectoris                         |       |
| N30                 | Cystitis                                                   |       | I25                                      | Chronic ischaemic heart disease         |       |
| E11                 | Non-Insulin-dependent diabetes mellitus                    | 651   | E11                                      | Non-Insulin-dependent diabetes mellitus | 2143  |
| E10                 | Insulin-dependent diabetes mellitus                        |       | E10                                      | Insulin-dependent diabetes mellitus     |       |
| J18                 | Pneumonia, organism unspecified                            |       | H25                                      | Senile cataract                         |       |
| G45                 | Transient cerebral ischaemic attacks and related syndromes | 595   | E11                                      | Non-Insulin-dependent diabetes mellitus | 2076  |
| I63                 | Cerebral infarction                                        |       | E10                                      | Insulin-dependent                       |       |

|     |                                                    |     |     |                                                                         |      |
|-----|----------------------------------------------------|-----|-----|-------------------------------------------------------------------------|------|
| I69 | Sequelae of cerebrovascular disease                |     | H36 | diabetes mellitus<br>Retinal disorders in diseases classified elsewhere |      |
| M17 | Gonarthrosis [arthrosis of knee]                   | 565 | E11 | Non-Insulin-dependent diabetes mellitus                                 | 2015 |
| I10 | Essential (primary) hypertension                   |     | E10 | Insulin-dependent diabetes mellitus                                     |      |
| N30 | Cystitis                                           |     | N30 | Cystitis                                                                |      |
| I21 | Acute myocardial infarction                        | 460 | I21 | Acute myocardial infarction                                             | 1660 |
| I25 | Chronic ischaemic heart disease                    |     | I25 | Chronic ischaemic heart disease                                         |      |
| J18 | Pneumonia, organism unspecified                    |     | N30 | Cystitis                                                                |      |
| I20 | Angina pectoris                                    | 454 | E11 | Non-Insulin-dependent diabetes mellitus                                 | 1613 |
| I25 | Chronic ischaemic heart disease                    |     | E10 | Insulin-dependent diabetes mellitus                                     |      |
| I73 | Other peripheral vascular diseases                 |     | N39 | Other disorders of urinary system                                       |      |
| I64 | Stroke, not specified as haemorrhage or infarction | 437 | E11 | Non-Insulin-dependent diabetes mellitus                                 | 1565 |
| J18 | Pneumonia, organism unspecified                    |     | E10 | Insulin-dependent diabetes mellitus                                     |      |
| J15 | Bacterial pneumonia, not elsewhere classified      |     | N18 | Chronic renal failure                                                   |      |
| I20 | Angina pectoris                                    | 404 | N40 | Hyperplasia of prostate                                                 | 1564 |
| I48 | Atrial fibrillation and flutter                    |     | I10 | Essential (primary) hypertension                                        |      |
| I49 | Other cardiac arrhythmias                          |     | N30 | Cystitis                                                                |      |
| J44 | Other chronic obstructive pulmonary disease        | 375 | E11 | Non-Insulin-dependent diabetes mellitus                                 | 1481 |
| J42 | Unspecified chronic bronchitis                     |     | E10 | Insulin-dependent diabetes mellitus                                     |      |
| N30 | Cystitis                                           |     | D64 | Other anaemias                                                          |      |
| N40 | Hyperplasia of prostate                            | 352 | I20 | Angina pectoris                                                         | 1472 |
| I10 | Essential (primary) hypertension                   |     | I25 | Chronic ischaemic heart disease                                         |      |
| I69 | Sequelae of cerebrovascular disease                |     | N18 | Chronic renal failure                                                   |      |
| K80 | Cholelithiasis                                     | 338 | E11 | Non-Insulin-dependent diabetes mellitus                                 | 1406 |
| I10 | Essential (primary) hypertension                   |     | E10 | Insulin-dependent diabetes mellitus                                     |      |
| N30 | Cystitis                                           |     | E16 | Other disorders of pancreatic internal                                  |      |

|     |                                                        |     |     |                                               |           |  |  |
|-----|--------------------------------------------------------|-----|-----|-----------------------------------------------|-----------|--|--|
|     |                                                        |     |     |                                               | secretion |  |  |
| I20 | Angina pectoris                                        | 320 | I20 | Angina pectoris                               | 1369      |  |  |
| I25 | Chronic ischaemic heart disease                        |     | I25 | Chronic ischaemic heart disease               |           |  |  |
| K59 | Other functional intestinal disorders                  |     | I69 | Sequelae of cerebrovascular disease           |           |  |  |
| E11 | Non-Insulin-dependent diabetes mellitus                | 315 | I20 | Angina pectoris                               | 1363      |  |  |
| E10 | Insulin-dependent diabetes mellitus                    |     | I25 | Chronic ischaemic heart disease               |           |  |  |
| H36 | Retinal disorders in diseases classified elsewhere     |     | K59 | Other functional intestinal disorders         |           |  |  |
| J44 | Other chronic obstructive pulmonary disease            | 311 | I25 | Chronic ischaemic heart disease               | 1291      |  |  |
| M81 | Osteoporosis without pathological fracture             |     | J18 | Pneumonia, organism unspecified               |           |  |  |
| J15 | Bacterial pneumonia, not elsewhere classified          |     | J15 | Bacterial pneumonia, not elsewhere classified |           |  |  |
| I64 | Stroke, not specified as haemorrhage or infarction     | 309 | E11 | Non-Insulin-dependent diabetes mellitus       | 1283      |  |  |
| I61 | Intracerebral haemorrhage                              |     | E10 | Insulin-dependent diabetes mellitus           |           |  |  |
| I69 | Sequelae of cerebrovascular disease                    |     | L97 | Ulcer of lower limb, not elsewhere classified |           |  |  |
| M17 | Gonarthrosis [arthrosis of knee]                       | 300 | H91 | Other hearing loss                            | 1273      |  |  |
| I10 | Essential (primary) hypertension                       |     | I20 | Angina pectoris                               |           |  |  |
| N39 | Other disorders of urinary system                      |     | I50 | Heart failure                                 |           |  |  |
| F10 | Mental and behavioural disorders due to use of alcohol | 291 | I20 | Angina pectoris                               | 1245      |  |  |
| K70 | Alcoholic liver disease                                |     | I25 | Chronic ischaemic heart disease               |           |  |  |
| N30 | Cystitis                                               |     | I73 | Other peripheral vascular diseases            |           |  |  |
| I20 | Angina pectoris                                        | 278 | I20 | Angina pectoris                               | 1205      |  |  |
| I50 | Heart failure                                          |     | I50 | Heart failure                                 |           |  |  |
| D64 | Other anaemias                                         |     | D64 | Other anaemias                                |           |  |  |
| I10 | Essential (primary) hypertension                       | 263 | I20 | Angina pectoris                               | 1114      |  |  |
| D64 | Other anaemias                                         |     | I25 | Chronic ischaemic heart disease               |           |  |  |
| D63 | Anaemia in chronic diseases classified elsewhere       |     | J15 | Bacterial pneumonia, not elsewhere classified |           |  |  |
| I20 | Angina pectoris                                        | 256 | E11 | Non-Insulin-dependent                         | 1100      |  |  |

|     |                                                              |     |     |                                                             |      |
|-----|--------------------------------------------------------------|-----|-----|-------------------------------------------------------------|------|
| K30 | Dyspepsia                                                    |     | E10 | diabetes mellitus<br>Insulin-dependent<br>diabetes mellitus |      |
| I10 | Essential (primary)<br>hypertension                          |     | I69 | Sequelae of<br>cerebrovascular disease                      |      |
| J44 | Other chronic obstructive<br>pulmonary disease               | 256 | H91 | Other hearing loss                                          | 1092 |
| K59 | Other functional intestinal<br>disorders                     |     | I20 | Angina pectoris                                             |      |
| J96 | Respiratory failure, not<br>elsewhere classified             |     | I48 | Atrial fibrillation and<br>flutter                          |      |
| N40 | Hyperplasia of prostate                                      | 252 | E11 | Non-Insulin-dependent<br>diabetes mellitus                  | 1086 |
| C61 | Malignant neoplasm of<br>prostate                            |     | E14 | Unspecified diabetes<br>mellitus                            |      |
| N30 | Cystitis                                                     |     | N39 | Other disorders of urinary<br>system                        |      |
| F10 | Mental and behavioural<br>disorders due to use of<br>alcohol | 250 | I21 | Acute myocardial<br>infarction                              | 1073 |
| I64 | Stroke, not specified as<br>haemorrhage or infarction        |     | I25 | Chronic ischaemic heart<br>disease                          |      |
| I69 | Sequelae of cerebrovascular<br>disease                       |     | I69 | Sequelae of<br>cerebrovascular disease                      |      |
| E11 | Non-Insulin-dependent<br>diabetes mellitus                   | 241 | I21 | Acute myocardial<br>infarction                              | 1067 |
| E10 | Insulin-dependent diabetes<br>mellitus                       |     | I25 | Chronic ischaemic heart<br>disease                          |      |
| N30 | Cystitis                                                     |     | N18 | Chronic renal failure                                       |      |
| F10 | Mental and behavioural<br>disorders due to use of<br>alcohol | 236 | E11 | Non-Insulin-dependent<br>diabetes mellitus                  | 1045 |
| J18 | Pneumonia, organism<br>unspecified                           |     | E10 | Insulin-dependent<br>diabetes mellitus                      |      |
| J15 | Bacterial pneumonia, not<br>elsewhere classified             |     | N19 | Unspecified renal failure                                   |      |
| E11 | Non-Insulin-dependent<br>diabetes mellitus                   | 223 | I20 | Angina pectoris                                             | 1044 |
| H25 | Senile cataract                                              |     | I25 | Chronic ischaemic heart<br>disease                          |      |
| H26 | Other cataract                                               |     | E14 | Unspecified diabetes<br>mellitus                            |      |
| I20 | Angina pectoris                                              | 218 | E11 | Non-Insulin-dependent<br>diabetes mellitus                  | 1040 |
| I25 | Chronic ischaemic heart<br>disease                           |     | J18 | Pneumonia, organism<br>unspecified                          |      |
| N18 | Chronic renal failure                                        |     | J15 | Bacterial pneumonia, not                                    |      |

|     |                                               |     |     |                                                           |      |
|-----|-----------------------------------------------|-----|-----|-----------------------------------------------------------|------|
|     |                                               |     |     | elsewhere classified                                      |      |
| I10 | Essential (primary) hypertension              | 215 | I20 | Angina pectoris                                           | 1036 |
| M80 | Osteoporosis with pathological fracture       |     | I50 | Heart failure                                             |      |
| E86 | Volume depletion                              |     | N18 | Chronic renal failure                                     |      |
| N40 | Hyperplasia of prostate                       | 204 | H91 | Other hearing loss                                        | 1014 |
| I10 | Essential (primary) hypertension              |     | I20 | Angina pectoris                                           |      |
| D64 | Other anaemias                                |     | H25 | Senile cataract                                           |      |
| M54 | Dorsalgia                                     | 196 | E11 | Non-Insulin-dependent diabetes mellitus                   | 1011 |
| J44 | Other chronic obstructive pulmonary disease   |     | I70 | Atherosclerosis                                           |      |
| M81 | Osteoporosis without pathological fracture    |     | J18 | Pneumonia, organism unspecified                           |      |
| H91 | Other hearing loss                            | 190 | H91 | Other hearing loss                                        | 995  |
| I20 | Angina pectoris                               |     | I20 | Angina pectoris                                           |      |
| H25 | Senile cataract                               |     | E78 | Disorders of lipoprotein metabolism and other lipidaemias |      |
| E11 | Non-Insulin-dependent diabetes mellitus       | 190 | N40 | Hyperplasia of prostate                                   | 989  |
| I70 | Atherosclerosis                               |     | I10 | Essential (primary) hypertension                          |      |
| L97 | Ulcer of lower limb, not elsewhere classified |     | I69 | Sequelae of cerebrovascular disease                       |      |
| I10 | Essential (primary) hypertension              | 188 | E11 | Non-Insulin-dependent diabetes mellitus                   | 986  |
| N18 | Chronic renal failure                         |     | E14 | Unspecified diabetes mellitus                             |      |
| K65 | Peritonitis                                   |     | N18 | Chronic renal failure                                     |      |
| I20 | Angina pectoris                               | 178 | M17 | Gonarthrosis [arthrosis of knee]                          | 977  |
| I25 | Chronic ischaemic heart disease               |     | I10 | Essential (primary) hypertension                          |      |
| I69 | Sequelae of cerebrovascular disease           |     | N30 | Cystitis                                                  |      |
| N81 | Female genital prolapse                       | 177 | I20 | Angina pectoris                                           | 976  |
| I10 | Essential (primary) hypertension              |     | I70 | Atherosclerosis                                           |      |
| N30 | Cystitis                                      |     | J18 | Pneumonia, organism unspecified                           |      |
| C20 | Malignant neoplasm of rectum                  | 175 | I25 | Chronic ischaemic heart disease                           | 964  |
| C18 | Malignant neoplasm of colon                   |     | J18 | Pneumonia, organism unspecified                           |      |

|     |                                                                  |     |     |                                               |     |
|-----|------------------------------------------------------------------|-----|-----|-----------------------------------------------|-----|
| C78 | Secondary malignant neoplasm of respiratory and digestive organs |     | J96 | Respiratory failure, not elsewhere classified |     |
| E11 | Non-Insulin-dependent diabetes mellitus                          | 175 | E11 | Non-Insulin-dependent diabetes mellitus       | 961 |
| J18 | Pneumonia, organism unspecified                                  |     | I70 | Atherosclerosis                               |     |
| J15 | Bacterial pneumonia, not elsewhere classified                    |     | L97 | Ulcer of lower limb, not elsewhere classified |     |
| I64 | Stroke, not specified as haemorrhage or infarction               | 169 | I20 | Angina pectoris                               | 957 |
| G40 | Epilepsy                                                         |     | I25 | Chronic ischaemic heart disease               |     |
| J18 | Pneumonia, organism unspecified                                  |     | N19 | Unspecified renal failure                     |     |
| I83 | Varicose veins of lower extremities                              | 160 | I20 | Angina pectoris                               | 946 |
| I50 | Heart failure                                                    |     | I48 | Atrial fibrillation and flutter               |     |
| L97 | Ulcer of lower limb, not elsewhere classified                    |     | I49 | Other cardiac arrhythmias                     |     |
| F10 | Mental and behavioural disorders due to use of alcohol           | 158 | E10 | Insulin-dependent diabetes mellitus           | 929 |
| K70 | Alcoholic liver disease                                          |     | E14 | Unspecified diabetes mellitus                 |     |
| E87 | Other disorders of fluid, electrolyte and acid-base balance      |     | N18 | Chronic renal failure                         |     |
